# Supplementary material
Source: PubMed Central journal article supplement (PMC8407024)
Supplement: NIHMS1731619-supplement-Supplemental_Material.pdf [file NIHMS1731619-supplement-Supplemental_Material.pdf]

## Appendix

### 1. Measures for monetary delay discounting

This project utilized an abbreviated version of the Monetary Choice Questionnaire-36 (MCQ-36) that was adapted for repeated administration on a mobile phone app. Adaptations included shortening the overall length of the questionnaire by administering only the 12 items in the large category, and creating six alternative sets of items in order to prevent rote participant responses. The MCQ-36 items from the large category were used as a base for the new items, with the following two adjustments: (1) The delayed options ranged continuously from \$70-\$99, rather than being \$75, \$80, or \$85; (2) The duration of the delay was reduced to a maximum of 90 days, instead of 162 days. **Table 1a** summarizes the ranges for the reward amounts and the duration of delays for the delayed option that were associated with each k-value (1/days).

**Table 1a.** Base k-values and associated ranges for the reward amounts and duration of the delays for the delayed option for the mobile version of the MCQ

| Base K-value<br>(1/days) | Delayed rewards | Duration of delays<br>(days) |
|--------------------------|-----------------|------------------------------|
| 0.0020                   | 95-100          | 78 to 90                     |
| 0.0040                   | 95-100          | 66 to 78                     |
| 0.0080                   | 90-95           | 54 to 66                     |
| 0.0160                   | 90-95           | 45 to 54                     |
| 0.0320                   | 85-90           | 36 to 45                     |
| 0.0640                   | 85-90           | 27 to 36                     |
| 0.1280                   | 80-85           | 21 to 27                     |
| 0.2560                   | 80-85           | 15 to 21                     |
| 0.5120                   | 75-80           | 9 to 15                      |
| 1.0240                   | 75-80           | 6 to 9                       |
| 2.0480                   | 70-75           | 3 to 6                       |
| 4.0960                   | 70-75           | 1 to 4                       |

The amount of the delayed rewards and the duration of the delays were randomly selected from the respective ranges. The associated amount of the immediate reward was computed using the following formula: Immediate reward = delayed reward / (1+k) \* delay and rounded to the nearest whole number. **Table 1b** shows the resulting 12 items for each of the six

versions of the MCQ. The 12 items within each set were presented in random order. The order in which the six alternate versions were administered was also random across the 28-day study period.

**Table 1b.** Six sets of 12-item scales developed for EMA assessment.

| Set | Base K-value<br>(1/days) | Immediate<br>rewards | Delayed<br>rewards | Duration of delays<br>(days) |
|-----|--------------------------|----------------------|--------------------|------------------------------|
| 1   | 0.0020                   | 84                   | 99                 | 87                           |
|     | 0.0040                   | 73                   | 96                 | 77                           |
|     | 0.0080                   | 65                   | 93                 | 54                           |
|     | 0.0160                   | 50                   | 90                 | 49                           |
|     | 0.0320                   | 40                   | 86                 | 36                           |
|     | 0.0640                   | 27                   | 87                 | 34                           |
|     | 0.1280                   | 19                   | 84                 | 27                           |
|     | 0.2560                   | 14                   | 80                 | 19                           |
|     | 0.5120                   | 10                   | 78                 | 13                           |
|     | 1.0240                   | 9                    | 79                 | 8                            |
|     | 2.0480                   | 8                    | 74                 | 4                            |
|     | 4.0960                   | 5                    | 73                 | 3                            |
| 2   | 0.0020                   | 83                   | 98                 | 90                           |
|     | 0.0040                   | 74                   | 95                 | 69                           |
|     | 0.0080                   | 62                   | 92                 | 61                           |
|     | 0.0160                   | 54                   | 94                 | 46                           |
|     | 0.0320                   | 39                   | 86                 | 38                           |
|     | 0.0640                   | 27                   | 89                 | 36                           |
|     | 0.1280                   | 22                   | 85                 | 23                           |
|     | 0.2560                   | 14                   | 80                 | 18                           |
|     | 0.5120                   | 12                   | 77                 | 11                           |
|     | 1.0240                   | 11                   | 76                 | 6                            |
|     | 2.0480                   | 7                    | 74                 | 5                            |
|     | 4.0960                   | 8                    | 72                 | 2                            |
| 3   | 0.0020                   | 82                   | 96                 | 87                           |
|     | 0.0040                   | 75                   | 97                 | 72                           |
|     | 0.0080                   | 65                   | 95                 | 57                           |
|     | 0.0160                   | 53                   | 91                 | 45                           |
|     | 0.0320                   | 39                   | 85                 | 36                           |
|     | 0.0640                   | 27                   | 89                 | 36                           |
|     | 0.1280                   | 21                   | 85                 | 24                           |
|     | 0.2560                   | 16                   | 81                 | 16                           |
|     | 0.5120                   | 11                   | 79                 | 12                           |
|     | 1.0240                   | 8                    | 76                 | 7                            |
|     | 2.0480                   | 10                   | 71                 | 3                            |

|   |        |    |    |    |
|---|--------|----|----|----|
|   | 4.0960 | 8  | 75 | 2  |
| 4 | 0.0020 | 83 | 97 | 87 |
|   | 0.0040 | 74 | 95 | 70 |
|   | 0.0080 | 64 | 92 | 54 |
|   | 0.0160 | 50 | 90 | 51 |
|   | 0.0320 | 40 | 89 | 38 |
|   | 0.0640 | 29 | 87 | 31 |
|   | 0.1280 | 19 | 84 | 26 |
|   | 0.2560 | 16 | 80 | 16 |
|   | 0.5120 | 12 | 79 | 11 |
|   | 1.0240 | 9  | 77 | 7  |
|   | 2.0480 | 7  | 75 | 5  |
|   | 4.0960 | 5  | 70 | 3  |
| 5 | 0.0020 | 82 | 95 | 79 |
|   | 0.0040 | 75 | 98 | 76 |
|   | 0.0080 | 61 | 90 | 60 |
|   | 0.0160 | 51 | 94 | 53 |
|   | 0.0320 | 38 | 85 | 39 |
|   | 0.0640 | 27 | 89 | 35 |
|   | 0.1280 | 22 | 82 | 21 |
|   | 0.2560 | 16 | 82 | 16 |
|   | 0.5120 | 10 | 79 | 14 |
|   | 1.0240 | 9  | 80 | 8  |
|   | 2.0480 | 6  | 75 | 6  |
|   | 4.0960 | 5  | 72 | 3  |
| 6 | 0.0020 | 84 | 99 | 90 |
|   | 0.0040 | 75 | 96 | 70 |
|   | 0.0080 | 65 | 94 | 55 |
|   | 0.0160 | 50 | 92 | 53 |
|   | 0.0320 | 36 | 88 | 45 |
|   | 0.0640 | 29 | 89 | 32 |
|   | 0.1280 | 21 | 85 | 24 |
|   | 0.2560 | 14 | 83 | 19 |
|   | 0.5120 | 11 | 77 | 12 |
|   | 1.0240 | 10 | 79 | 7  |
|   | 2.0480 | 7  | 74 | 5  |
|   | 4.0960 | 8  | 71 | 2  |

## 2. Validity of MCQ responses

**Table 2.** The association of valid responses with time since substance use and being intoxicated

| Substances               | Valid MCQ responses | p-value |
|--------------------------|---------------------|---------|
| Time since last use      | n (%)               |         |
| Any substance use        |                     | 0.506   |
| <1 hour ago              | 718 (90.4)          |         |
| 1-2 hours ago            | 542 (89.1)          |         |
| 2-4 hours ago            | 271 (86.2)          |         |
| 4-6 hours ago            | 137 (91.3)          |         |
| None in the past 6 hours | 1694 (92.2)         |         |
| Stimulant use            |                     | 0.623   |
| <1 hour ago              | 457 (90.3)          |         |
| 1-2 hours ago            | 352 (88.9)          |         |
| 2-4 hours ago            | 220 (83.7)          |         |
| 4-6 hours ago            | 97 (88.2)           |         |
| None in the past 6 hours | 2246 (92.0)         |         |
| Alcohol use              |                     | 0.722   |
| <1 hour ago              | 273 (88.36)         |         |
| 1-2 hours ago            | 210 (92.5)          |         |
| 2-4 hours ago            | 148 (83.6)          |         |
| 4-6 hours ago            | 56 (88.9)           |         |
| None in the past 6 hours | 2685 (91.3)         |         |
| Marijuana use            |                     | 0.550   |
| <1 hour ago              | 255 (87.9)          |         |
| 1-2 hours ago            | 214 (89.5)          |         |
| 2-4 hours ago            | 136 (85.5)          |         |
| 4-6 hours ago            | 57 (91.9)           |         |
| None in the past 6 hours | 2710 (91.4)         |         |
| Being intoxicated        | Beta (SE)           |         |
| Stimulant use            | -0.03 (0.12)        | 0.772   |
| Alcohol use              | -0.06 (0.04)        | 0.067   |
| Marijuana use            | -0.04 (0.03)        | 0.123   |

p-value was estimated using generalized mixed effects model.
